# Supplementary material for: Adherence to a Fish-Rich Dietary Pattern Is Associated with Chronic Hepatitis C Patients Showing Low Viral Load: Implications for Nutritional Management
Source: MDPI journal article supplement (doi:10.3390/nu13103337), 2021-09-23
Supplement: s1 [file s1]

Table S1. Factor loading matrix of main dietary patterns identified in anti-HCV positive patients.

| Food groups                       | Dietary patterns            |                                         |                        |               |
|-----------------------------------|-----------------------------|-----------------------------------------|------------------------|---------------|
|                                   | Meat and soft drinks<br>DP1 | Processed animal<br>and fried foods DP2 | Mexican-healthy<br>DP3 | Fish-rich DP4 |
| Tortilla                          | -0.009                      | 0.012                                   | -0.080                 | 0.113         |
| Whole grains                      | -0.029                      | -0.002                                  | 0.122                  | -0.042        |
| Legumes                           | -0.008                      | 0.016                                   | 0.064                  | 0.026         |
| Fruits                            | -0.077                      | -0.164                                  | <b>0.770</b>           | 0.019         |
| Vegetables                        | -0.013                      | 0.022                                   | <b>0.502</b>           | 0.100         |
| Red meat                          | <b>0.665</b>                | 0.188                                   | 0.036                  | 0.065         |
| Chicken                           | 0.067                       | 0.057                                   | 0.214                  | 0.286         |
| Pork                              | <b>0.749</b>                | 0.238                                   | -0.101                 | 0.037         |
| Fish                              | 0.071                       | 0.041                                   | 0.110                  | <b>0.896</b>  |
| Seafood                           | 0.081                       | 0.000                                   | -0.121                 | 0.255         |
| Milk and dairy                    | -0.130                      | -0.111                                  | -0.010                 | -0.017        |
| Vegetable oils                    | 0.025                       | -0.079                                  | 0.206                  | 0.186         |
| Avocado                           | 0.011                       | 0.119                                   | -0.150                 | 0.141         |
| Processed meat                    | 0.165                       | <b>0.693</b>                            | 0.070                  | 0.124         |
| Bacon                             | <b>0.308</b>                | <b>0.456</b>                            | -0.256                 | -0.077        |
| Cream,<br>mayonnaise,<br>dressing | 0.175                       | <b>0.504</b>                            | -0.033                 | 0.019         |
| Butter,<br>margarine              | 0.091                       | 0.181                                   | -0.056                 | -0.158        |
| Fried foods                       | 0.105                       | <b>0.376</b>                            | -0.157                 | -0.027        |
| Nuts                              | 0.005                       | -0.024                                  | 0.090                  | 0.007         |
| Soft drinks                       | <b>0.335</b>                | 0.087                                   | -0.078                 | 0.034         |
| Coffee                            | 0.260                       | 0.064                                   | 0.000                  | 0.075         |
| Baked goods                       | 0.002                       | 0.084                                   | 0.014                  | 0.031         |
| Sugar, sweets                     | -0.103                      | 0.026                                   | -0.097                 | 0.010         |

DP, dietary pattern. In bold are those food groups representative of each DP based on a factor loading cutoff value score of  $\geq 0.30$ .
